# Supplementary material for: A series of lanthanide–quinoxaline-2,3(1H,4H)-dione complexes containing 1D chiral Ln2O3 (Ln = Eu, Tb, Sm, Dy) chains: luminescent properties and response to small molecules
Source: Royal Society of Chemistry journal article supplement (doi:10.1039/d1ra05719g), 2021-01-01
Supplement: d1ra05719g1.pdf [file d1ra05719g1.pdf]

## Supporting Information

### A Series of Lanthanide–quinoxaline-2,3(1H,4H)-dione Complexes Containing 1D Chiral Ln<sub>2</sub>O<sub>3</sub> (Ln= Eu, Tb, Sm, Dy) Chains: Luminescent Properties and Response to Small Molecules

Sadaf ul Hassan,<sup>\*a,b,d</sup> Muhammad Asim Farid<sup>c,d</sup> and Yingxia Wang<sup>\*d</sup>

<sup>a</sup> *University of Management & Technology (UMT), Lahore, 54770, Pakistan*

<sup>b</sup> *COMSATS University Islamabad (CUI), Lahore Campus, Lahore, 54000, Pakistan*

<sup>c</sup> *Department of Chemistry, Division of Science and Technology, University of Education Lahore Pakistan*

<sup>d</sup> *State Key Laboratory of Rare Earth Materials Chemistry and Applications, College of Chemistry and Molecular Engineering, Peking University, Beijing 100871, P. R. China*

*\*Email: [yxwang@pku.edu.cn](mailto:yxwang@pku.edu.cn), and [sadaf.hassan@umt.edu.pk](mailto:sadaf.hassan@umt.edu.pk) Tel.: (+8610) 6275 5538 Fax: (+8610) 6275*

**Table S1** Selected bond lengths [Å] and angles [°] in complex **1**.

| <b>Bond lengths (Å)</b>        |           |                                   |           |
|--------------------------------|-----------|-----------------------------------|-----------|
| Eu(1)—O(1)                     | 2.473(7)  | Eu(2)—O(1)                        | 2.572(7)  |
| Eu(1)—O(3)                     | 2.452(7)  | Eu(2)—O(2)                        | 2.322(7)  |
| Eu(1)—O(4)                     | 2.477(6)  | Eu(2)—O(4)                        | 2.439(7)  |
| Eu(1)—O(6)# <sup>i</sup>       | 2.443(7)  | Eu(2)—O(5)                        | 2.373(7)  |
| Eu(1)—O(7)# <sup>ii</sup>      | 2.354(6)  | Eu(2)—O(6)                        | 2.482(6)  |
| Eu(1)—O(7)# <sup>iii</sup>     | 2.376(3)  | Eu(2)—O(7)# <sup>ii</sup>         | 2.374(3)  |
| Eu(1)—O(8)                     | 2.424(7)  | Eu(2)—O(8)# <sup>ii</sup>         | 2.516(6)  |
| Eu(1)—O(9)                     | 2.406(6)  | Eu(2)—O(8)# <sup>iii</sup>        | 2.362(6)  |
| O(1)—C(1)                      | 1.319(3)  | O(2)—C(2)                         | 1.308(6)  |
| O(3)—C(9)                      | 1.226(1)  | O(4)—C(10)                        | 1.313(6)  |
| O(5)—C(17)                     | 1.264(5)  | O(6)—C(18)                        | 1.291(2)  |
| N(1)—C(1)                      | 1.286(2)  | N(2)—C(2)                         | 1.302(1)  |
| N(3)—C(9)                      | 1.323(1)  | N(4)—C(10)                        | 1.262(1)  |
| N(5)—C(17)                     | 1.310(9)  | N(6)—C(18)                        | 1.302(4)  |
| <b>Bond angles</b>             |           |                                   |           |
| O(7)—Eu(1)—O(7)# <sup>ii</sup> | 71.876(2) | O(2)—Eu(2)—O(7)# <sup>ii</sup>    | 94.02(3)  |
| O(7)—Eu(1)—O(8)                | 72.5(2)   | O(8)—Eu(2)—O(8)                   | 74.594(2) |
| O(9)—Eu(1)—O(8)                | 83.0(2)   | O(8)—Eu(2)—O(5)                   | 130(2)    |
| O(6)—Eu(1)—O(3)                | 145(1)    | O(8)—Eu(2)—O(7)# <sup>ii</sup>    | 127.5(2)  |
| O(7)—Eu(1)—O(6)# <sup>i</sup>  | 100.0(2)  | O(5)—Eu(2)—O(4)                   | 152.9(2)  |
| O(9)—Eu(1)—O(3)                | 75.4(3)   | O(7)# <sup>i</sup> —Eu(2)—O(6)    | 141.7(2)  |
| O(8)—Eu(1)—O(3)                | 84.8(2)   | O(4)—Eu(2)—O(6)                   | 140.3(2)  |
| O(8)—Eu(1)—O(1)                | 152.9(2)  | O(2)—Eu(2)—O(8)                   | 157.3(2)  |
| Eu(1)—O(7)—Eu(2)               | 99.3(2)   | Eu(1)# <sup>iii</sup> —O(6)—Eu(2) | 109.3(3)  |
| N(3)—C(9)—C(10)                | 113.8(1)  | O(4)—C(10)—C(9)                   | 111.7(2)  |

#<sup>i</sup> -1+x, y, z; #<sup>ii</sup> -x, 1-y, -z; #<sup>iii</sup> 1+x, y, z.

**Table S2** Hydrogen bonds [ $\text{\AA}$ ] and angles [ $^\circ$ ] found in complex 1.

| D-H $\cdots$ A                                                 | D-H ( $\text{\AA}$ ) | H $\cdots$ A ( $\text{\AA}$ ) | D $\cdots$ A ( $\text{\AA}$ ) | D $\cdots$ H $\cdots$ A ( $^\circ$ ) |
|----------------------------------------------------------------|----------------------|-------------------------------|-------------------------------|--------------------------------------|
| Hydrogen bonding interaction between adjacent chiral 1D chains |                      |                               |                               |                                      |
| N(1)-H(1A) $\cdots$ O(9)                                       | 0.88                 | 1.94                          | 2.705                         | 144.2                                |
| N(2)-H(2A) $\cdots$ O(10) <sup>#i</sup>                        | 0.88                 | 2.02                          | 2.831                         | 153.3                                |
| N(4)-H(4A) $\cdots$ O(8) <sup>#ii</sup>                        | 0.88                 | 2.10                          | 2.886                         | 147.8                                |
| N(5)-H(5A) $\cdots$ O(10)                                      | 0.88                 | 2.02                          | 2.789                         | 145.8                                |
| N(6)-H(6A) $\cdots$ O(7) <sup>#iii</sup>                       | 0.88                 | 1.97                          | 2.781                         | 153.0                                |

#i  $x+1/2, -y+1/2, z+1/2$ ; #ii  $x+1, y, z$ ; #iii  $-x+1, -y+1, -z$

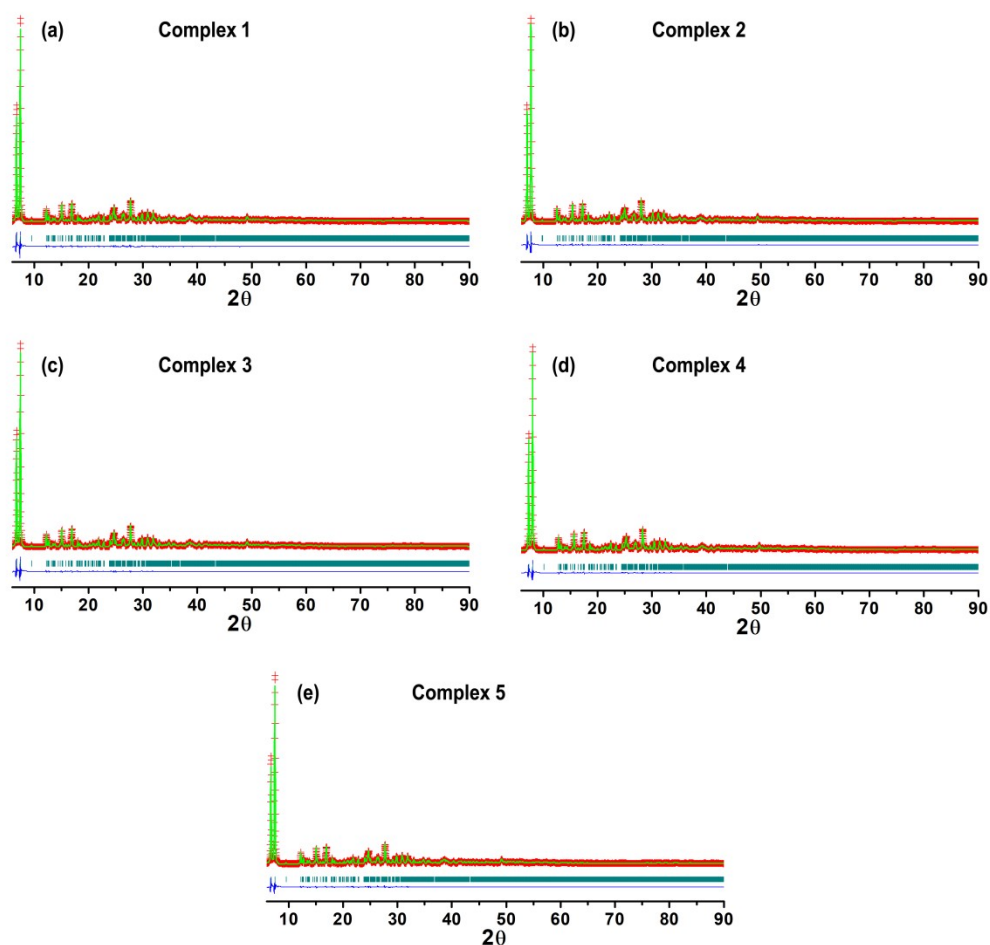**Figure S1.** Rietveld plot of powder X-ray diffraction pattern of the complexes 1-5

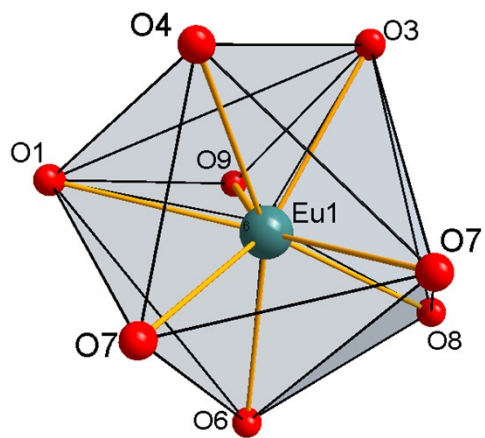

**Figure S2.** Coordination polyhedron of the Eu1 in complex **1**

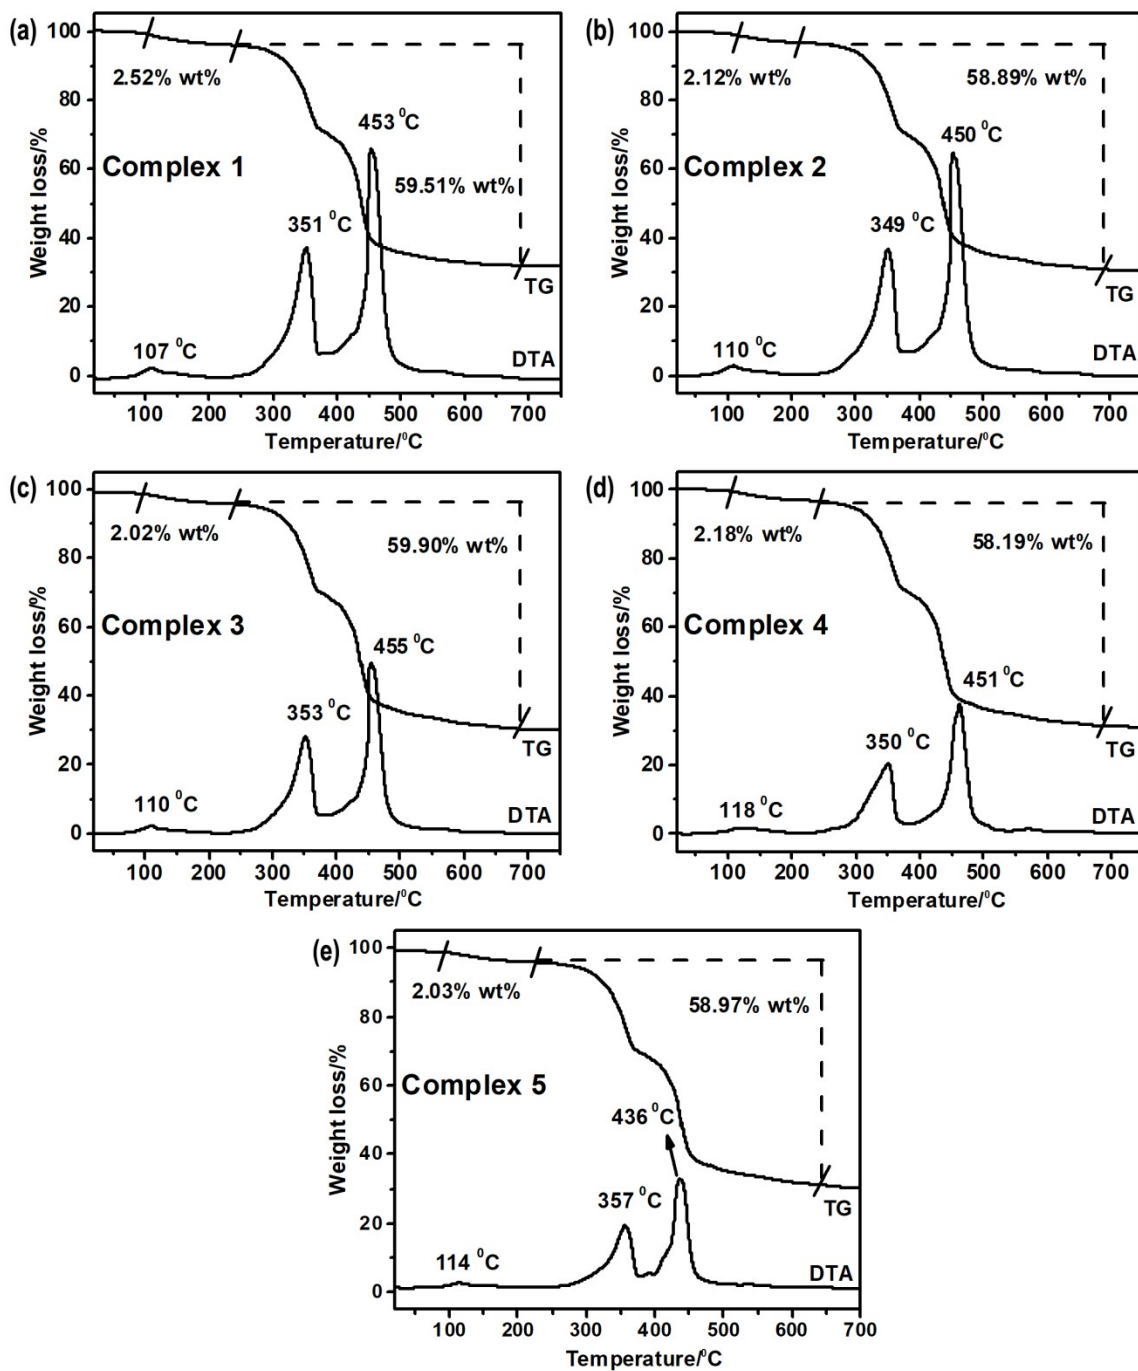

**Figure S3.** Thermogravimetric analyses (TGA) and differential thermogravimetric analyses (DTA) curves at a heating rate of  $10\text{ }^{\circ}\text{C}\cdot\text{min}^{-1}$  under Argon for complexes 1-5.

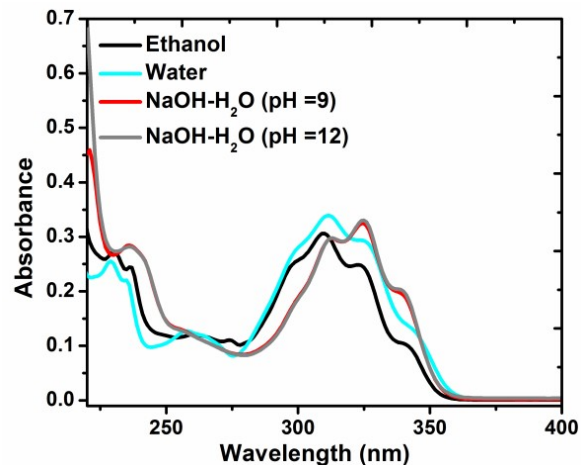

**Figure S4.** The UV-vis. spectrum of free H<sub>2</sub>QXD ligand in ethanol and water (concentration =  $1.25 \times 10^{-4}$  M).

**Table S3.** Electronic absorption spectral data of ligand in water and ethanol with concentration of  $1.25 \times 10^{-4}$  M.

| Solvent | Solvents            | Absorptions: $\lambda_{\max}$ (nm), ( $\epsilon$ , mM <sup>-1</sup> cm <sup>-1</sup> )     |
|---------|---------------------|--------------------------------------------------------------------------------------------|
| 1       | Ethanol             | 228 (2.19), 236 (1.95), 261 (0.98), 274 (0.91), 298 (2.04), 309 (2.48), 324 (2), 341 (0.8) |
| 2       | Water               | 228 (3.23), 235 (1.76), 257 (1.05), 297 (2.22), 311 (2.74), 326 (2.36), 344 (1.06)         |
| 3       | NaOH-Water (pH= 9)  | 236 (2.29), 312 (2.4), 324 (2.61), 340 (1.62)                                              |
| 4       | NaOH-Water (pH= 12) | 236 (2.29), 312 (2.4), 324 (2.61), 340 (1.62)                                              |

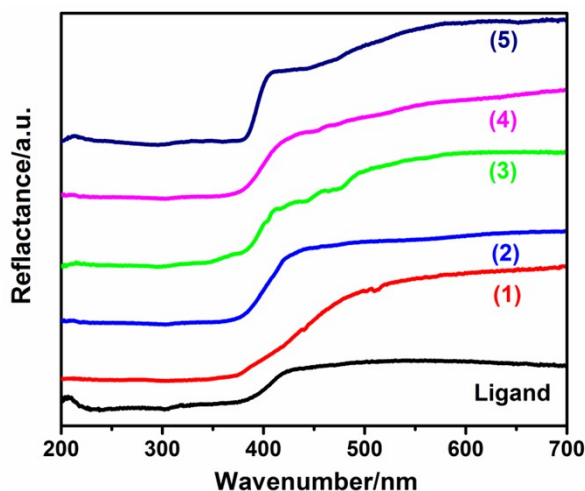

**Figure S5.** Solid-state diffuse reflectance spectra of the free ligand (black line) and the compounds **1** (red), **2** (blue), **3** (green), **4** (pink) and **5** (navy blue).

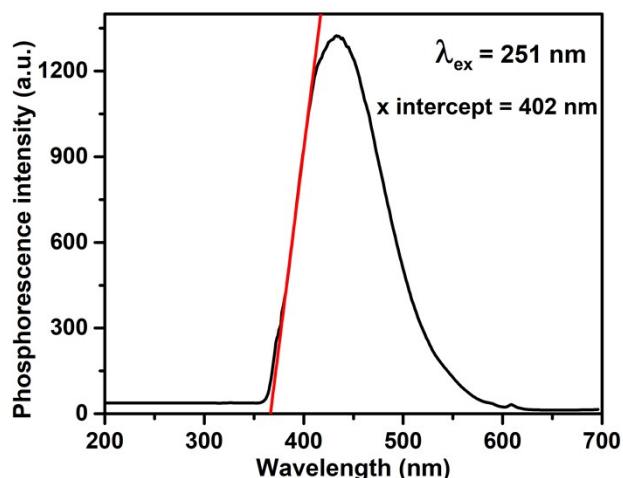

**Figure S6.** The phosphorescence spectrum of complex **5** at 77 K.

### Photo-luminescence properties of complexes **3** and **4**

The excitation bands for complex **3** under the emission of 561 nm show three main peaks at 226, 271 and 333 nm. Under the excitation of 271 nm (the maximum excitation wavelength), the complex **3** shows three emission peaks, at 562, 590 and 670, which may be attributed to  ${}^4G_{5/2} \rightarrow {}^6H_{5/2}$ ,  ${}^4G_{5/2} \rightarrow {}^6H_{7/2}$ ,  ${}^4G_{5/2} \rightarrow {}^6H_{9/2}$  transitions respectively (**Figure S7a**).<sup>1</sup> The excitation spectra of complex **4** under the emission of 481 nm exhibit three main peaks at 269 and 346 nm and a characteristic feature corresponding to the metal-centred transition at 367 nm ( ${}^4M_{9/2} \rightarrow {}^6H_{15/2}$ ) for the Dy(III) derivatives. The luminescence spectrum shows two apparent emission band at 481 nm ( ${}^4F_{9/2} \rightarrow {}^6H_{15/2}$ ) and 574 nm ( ${}^4F_{9/2} \rightarrow {}^6H_{13/2}$ ) and a small band at 654 nm ( ${}^4F_{9/2} \rightarrow {}^6H_{11/2}$ ) under the excitation of 269 nm (**Figure S7b**).<sup>2</sup> The complex **4** exhibits typical blue and yellow emission of Dy(III) for  ${}^4F_{9/2} \rightarrow {}^6H_n$  ( $n = 15/2, 13/2, 11/2$ ) transitions with little intense band at 481 nm ( ${}^4F_{9/2} \rightarrow {}^6H_{15/2}$ ).<sup>2</sup> It is obvious that the intensity of the blue emission, corresponding to the  ${}^4F_{9/2} \rightarrow {}^6H_{15/2}$  transition, is a little stronger than that of the yellow one  ${}^4F_{9/2} \rightarrow {}^6H_{13/2}$  (**Figure S7b**).

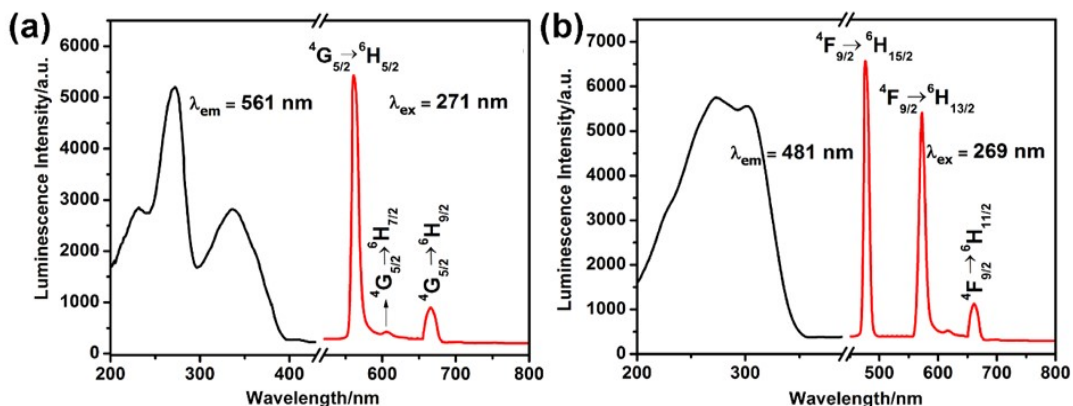

**Figure S7.** Excitation and emission spectra of: a)  $[\text{Sm}_2\text{O}_2(\text{OH})(\text{HQXD})(\text{H}_2\text{QXD})_2]\cdot\text{H}_2\text{O}$  (**3**); b)  $[\text{Dy}_2\text{O}_2(\text{OH})(\text{HQXD})(\text{H}_2\text{QXD})_2]\cdot\text{H}_2\text{O}$  (**4**).

### Details on Complex 2'

$[\text{Tb}_2\text{O}_2(\text{OH})(\text{HQXD})(\text{H}_2\text{QXD})_2]$  (**2'**): Anal. Calcd. for  $\text{C}_{24}\text{H}_{18}\text{N}_6\text{O}_9\text{Tb}_2$  (852 gm): C, 33.82; H, 2.13; N 9.86%. Found: C, 33.80; H, 2.11; N 9.85%. IR (KBr.  $\nu/\text{cm}^{-1}$ ): 3002 (w), 2916 (w), 2821 (w), 1630 (s), 1450 (m), 1334 (m), 802 (m), 699 (w), 583 (w) and 518 (w).

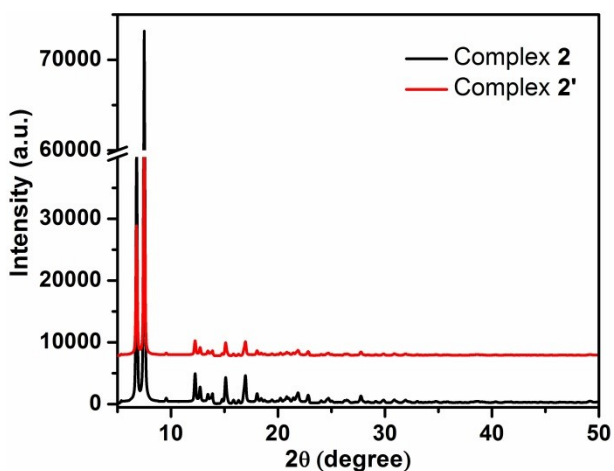

**Figure S8.** Powder X-ray diffraction profiles of complexes **2** and **2'**.



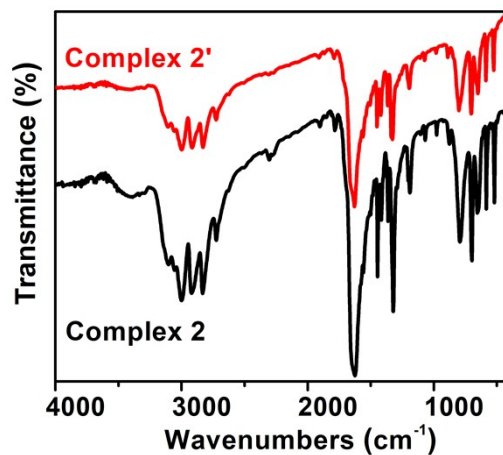

**Figure S9.** FTIR spectra of complexes **2** and **2'**

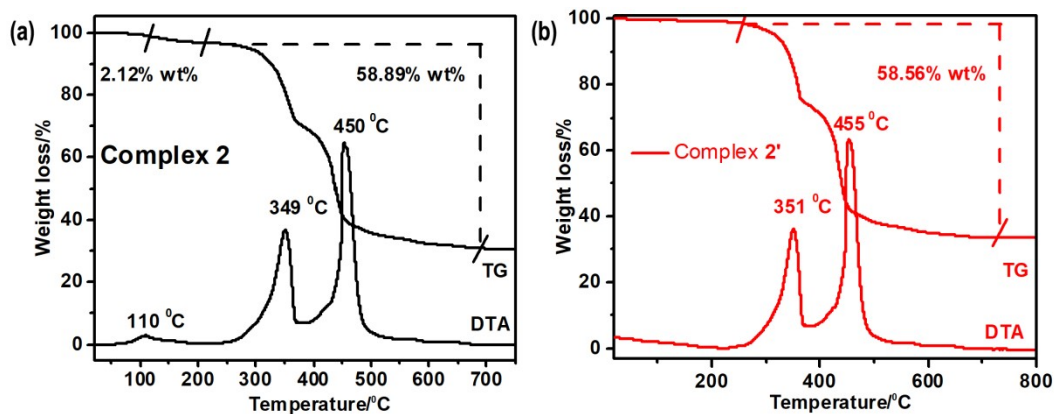

**Figure S10** Thermogravimetric analyses (TGA) and differential thermogravimetric analyses (DTA) curves at a heating rate of 10 °C·min<sup>-1</sup> under Argon for complexes (a) **2** and (b) **2'**.

**Table S4.** The Dielectric constant (k) and normalized Christian Reichard ( $E_T^N$ ) values of different solvents.

| No. | Solvents                 | $E_T^N$ | Dielectric constant (K) |
|-----|--------------------------|---------|-------------------------|
| 1   | <i>Tert</i> - butanol    | 0.389   | 11.2                    |
| 2   | Sec. butanol             | 0.493   | 16.6                    |
| 3   | n-butanol                | 0.536   | 17.8                    |
| 4   | Iso-propyl alcohol (IPA) | 0.546   | 17.9                    |
| 5   | propanol                 | 0.617   | 20.1                    |
| 6   | Ethanol (EtOH)           | 0.654   | 24.5                    |
| 7   | Methanol (MeOH)          | 0.762   | 32.6                    |
| 8   | Water                    | 1.0     | 80.1                    |
| 9   | DMSO                     | 0.444   | 46.7                    |
| 10  | DMF                      | 0.386   | 36.7                    |
| 11  | CHCl <sub>3</sub>        | 0.259   | 4.81                    |
| 12  | THF                      | 0.207   | 7.6                     |

Dielectric constant =  $K$ ,<sup>3</sup> normalized Christian Reichard values =  $E_T^N$ <sup>4</sup>

## References

1. W. Ahmad, L. Zhang and Y. Zhou, A series of mononuclear lanthanide complexes featuring 3-D supramolecular networks: synthesis, characterization and luminescent properties for sensing guest molecules, *Photochemical & Photobiological Sciences*, 2014, **13**, 660-670.
2. W. Ahmad, L. Zhang and Y. Zhou, 2-D lanthanide–organic complexes constructed from 6, 7-dihydropyrido (2, 3-d) pyridazine-5, 8-dione: synthesis, characterization and photoluminescence for sensing small molecules, *CrystEngComm*, 2014, **16**, 3521-3531.
3. J. A. Riddick, W. B. Bunger and T. K. Sakano, Organic solvents: physical properties and methods of purification, 1986.
4. C. Reichardt, Solvatochromic dyes as solvent polarity indicators, *Chemical reviews*, 1994, **94**, 2319-2358.
